# Supplementary material for: Identification of Potential Risk Genes and the Immune Landscape of Idiopathic Pulmonary Arterial Hypertension via Microarray Gene Expression Dataset Reanalysis
Source: MDPI journal article supplement (doi:10.3390/genes12010125), 2021-01-19
Supplement: s1 [file s1]

| Input Sample | B cells naive |       | B cells memory |       | Plasma cells |       | T cells CD8 naive |       | T cells CD4 memory resting |       | T cells CD4 T cells memory activated |       | T cells follicular helper |       | T cells regulatory (Tregs) |       | T cells gamma delta |       | NK cells resting |       | NK cells activated |       | Monocytes |       | Macrophages M0 |       | Macrophages M1 |  | Macrophages M2 |  | Dendritic cells resting |  | Dendritic cells activated |  | Mast cells resting |  | Mast cells activated |  | Eosinophils |  | Neutrophils |  | P-value |  | Pearson Correlation |  | RMSE |  |
|--------------|---------------|-------|----------------|-------|--------------|-------|-------------------|-------|----------------------------|-------|--------------------------------------|-------|---------------------------|-------|----------------------------|-------|---------------------|-------|------------------|-------|--------------------|-------|-----------|-------|----------------|-------|----------------|--|----------------|--|-------------------------|--|---------------------------|--|--------------------|--|----------------------|--|-------------|--|-------------|--|---------|--|---------------------|--|------|--|
|              | 0.012         | 0     | 0              | 0.025 | 0.056        | 0     | 0.225             | 0.012 | 0                          | 0.011 | 0.007                                | 0     | 0.035                     | 0.032 | 0.054                      | 0.268 | 0                   | 0.009 | 0.113            | 0     | 0                  | 0.047 | 0.020     | 0.247 | 0.983          |       |                |  |                |  |                         |  |                           |  |                    |  |                      |  |             |  |             |  |         |  |                     |  |      |  |
| GSMT3290067  | 0.012         | 0     | 0              | 0.025 | 0.056        | 0     | 0.225             | 0.012 | 0                          | 0.011 | 0.007                                | 0     | 0.035                     | 0.032 | 0.054                      | 0.268 | 0                   | 0.009 | 0.113            | 0     | 0                  | 0.047 | 0.020     | 0.247 | 0.983          |       |                |  |                |  |                         |  |                           |  |                    |  |                      |  |             |  |             |  |         |  |                     |  |      |  |
| GSMT3290068  | 0.008         | 0.019 | 0.024          | 0.055 | 0            | 0.230 | 0.019             | 0     | 0                          | 0     | 0.043                                | 0     | 0.058                     | 0.015 | 0                          | 0.268 | 0                   | 0.042 | 0.153            | 0     | 0                  | 0     | 0.010     | 0.307 | 0.955          |       |                |  |                |  |                         |  |                           |  |                    |  |                      |  |             |  |             |  |         |  |                     |  |      |  |
| GSMT3290069  | 0.003         | 0.005 | 0.026          | 0.041 | 0            | 0.099 | 0.006             | 0     | 0                          | 0     | 0.036                                | 0.001 | 0.065                     | 0.261 | 0.003                      | 0.236 | 0                   | 0.063 | 0.137            | 0     | 0                  | 0.017 | 0.010     | 0.297 | 0.968          |       |                |  |                |  |                         |  |                           |  |                    |  |                      |  |             |  |             |  |         |  |                     |  |      |  |
| GSMT3290070  | 0.011         | 0.013 | 0.027          | 0.092 | 0            | 0.183 | 0                 | 0     | 0                          | 0     | 0                                    | 0.016 | 0.025                     | 0.181 | 0.005                      | 0.235 | 0                   | 0.024 | 0.159            | 0     | 0.003              | 0.028 | 0.020     | 0.281 | 0.970          |       |                |  |                |  |                         |  |                           |  |                    |  |                      |  |             |  |             |  |         |  |                     |  |      |  |
| GSMT3290072  | 0.056         | 0     | 0.017          | 0.092 | 0            | 0.172 | 0.006             | 0     | 0                          | 0     | 0.045                                | 0     | 0.075                     | 0     | 0.017                      | 0.292 | 0                   | 0.081 | 0.083            | 0     | 0                  | 0     | 0.064     | 0.000 | 0.347          | 0.938 |                |  |                |  |                         |  |                           |  |                    |  |                      |  |             |  |             |  |         |  |                     |  |      |  |
| GSMT3290074  | 0.008         | 0.04  | 0.012          | 0.03  | 0            | 0.176 | 0.008             | 0     | 0                          | 0.117 | 0                                    | 0     | 0.035                     | 0.09  | 0.074                      | 0.211 | 0                   | 0.03  | 0.089            | 0     | 0                  | 0     | 0.008     | 0.000 | 0.320          | 0.951 |                |  |                |  |                         |  |                           |  |                    |  |                      |  |             |  |             |  |         |  |                     |  |      |  |
| GSMT3290075  | 0.026         | 0     | 0.024          | 0.015 | 0            | 0.181 | 0                 | 0     | 0                          | 0     | 0                                    | 0.004 | 0.021                     | 0.071 | 0                          | 0.226 | 0                   | 0.092 | 0.111            | 0     | 0                  | 0     | 0.005     | 0.020 | 0.275          | 0.976 |                |  |                |  |                         |  |                           |  |                    |  |                      |  |             |  |             |  |         |  |                     |  |      |  |
| GSMT3290077  | 0.002         | 0     | 0.022          | 0.036 | 0            | 0.127 | 0.01              | 0     | 0                          | 0.045 | 0.023                                | 0     | 0.038                     | 0.165 | 0.006                      | 0.171 | 0                   | 0.111 | 0.138            | 0     | 0                  | 0     | 0.106     | 0.000 | 0.317          | 0.954 |                |  |                |  |                         |  |                           |  |                    |  |                      |  |             |  |             |  |         |  |                     |  |      |  |
| GSMT3290082  | 0.002         | 0     | 0.019          | 0.038 | 0            | 0.128 | 0                 | 0     | 0                          | 0     | 0.020                                | 0.054 | 0                         | 0.027 | 0.127                      | 0     | 0.202               | 0     | 0.143            | 0.116 | 0                  | 0     | 0         | 0.019 | 0.000          | 0.338 | 0.945          |  |                |  |                         |  |                           |  |                    |  |                      |  |             |  |             |  |         |  |                     |  |      |  |
| GSMT3290084  | 0.011         | 0.004 | 0.016          | 0.054 | 0            | 0.214 | 0.002             | 0     | 0                          | 0     | 0                                    | 0     | 0.025                     | 0.047 | 0                          | 0.248 | 0                   | 0.186 | 0.159            | 0     | 0.008              | 0.025 | 0.000     | 0.375 | 0.927          |       |                |  |                |  |                         |  |                           |  |                    |  |                      |  |             |  |             |  |         |  |                     |  |      |  |
| GSMT3290089  | 0.016         | 0.02  | 0.031          | 0.128 | 0            | 0.251 | 0                 | 0     | 0                          | 0     | 0.01                                 | 0     | 0                         | 0.041 | 0                          | 0.196 | 0                   | 0.082 | 0.126            | 0     | 0.008              | 0.012 | 0.000     | 0.391 | 0.920          |       |                |  |                |  |                         |  |                           |  |                    |  |                      |  |             |  |             |  |         |  |                     |  |      |  |
| GSMT3290095  | 0.021         | 0     | 0.032          | 0     | 0            | 0.222 | 0.01              | 0     | 0                          | 0.08  | 0                                    | 0     | 0                         | 0.038 | 0.016                      | 0     | 0.187               | 0     | 0.119            | 0.187 | 0                  | 0.003 | 0.086     | 0.000 | 0.324          | 0.948 |                |  |                |  |                         |  |                           |  |                    |  |                      |  |             |  |             |  |         |  |                     |  |      |  |
| GSMT3290099  | 0.019         | 0.018 | 0.041          | 0.037 | 0            | 0.235 | 0                 | 0.024 | 0                          | 0     | 0.062                                | 0.04  | 0.053                     | 0.016 | 0.015                      | 0.163 | 0                   | 0.13  | 0.098            | 0     | 0.001              | 0.047 | 0.000     | 0.387 | 0.921          |       |                |  |                |  |                         |  |                           |  |                    |  |                      |  |             |  |             |  |         |  |                     |  |      |  |
| GSMT3291013  | 0.023         | 0     | 0.021          | 0.026 | 0            | 0.21  | 0                 | 0     | 0                          | 0     | 0.028                                | 0     | 0.028                     | 0.035 | 0                          | 0.219 | 0                   | 0.118 | 0.198            | 0     | 0                  | 0     | 0.034     | 0.020 | 0.262          | 0.974 |                |  |                |  |                         |  |                           |  |                    |  |                      |  |             |  |             |  |         |  |                     |  |      |  |
| GSMT3291015  | 0.006         | 0     | 0.022          | 0.028 | 0            | 0.273 | 0.012             | 0     | 0                          | 0.018 | 0.006                                | 0     | 0.029                     | 0.06  | 0.008                      | 0.274 | 0                   | 0.034 | 0.111            | 0     | 0                  | 0     | 0.119     | 0.010 | 0.307          | 0.957 |                |  |                |  |                         |  |                           |  |                    |  |                      |  |             |  |             |  |         |  |                     |  |      |  |
| GSMT3291016  | 0.035         | 0     | 0.022          | 0.029 | 0            | 0.153 | 0                 | 0     | 0                          | 0     | 0.026                                | 0.004 | 0.021                     | 0.019 | 0.004                      | 0.272 | 0                   | 0.094 | 0.233            | 0     | 0                  | 0     | 0.036     | 0.000 | 0.356          | 0.936 |                |  |                |  |                         |  |                           |  |                    |  |                      |  |             |  |             |  |         |  |                     |  |      |  |
| GSMT3291017  | 0.009         | 0.005 | 0.02           | 0.037 | 0            | 0.244 | 0                 | 0.012 | 0                          | 0     | 0.002                                | 0.054 | 0                         | 0.056 | 0                          | 0.053 | 0.271               | 0     | 0.053            | 0.169 | 0                  | 0     | 0         | 0.016 | 0.010          | 0.301 | 0.958          |  |                |  |                         |  |                           |  |                    |  |                      |  |             |  |             |  |         |  |                     |  |      |  |
| GSMT3291018  | 0             | 0.013 | 0.064          | 0.03  | 0            | 0.227 | 0                 | 0     | 0                          | 0.046 | 0.002                                | 0     | 0.015                     | 0.074 | 0.027                      | 0.278 | 0                   | 0.055 | 0.125            | 0     | 0.001              | 0.044 | 0.010     | 0.294 | 0.961          |       |                |  |                |  |                         |  |                           |  |                    |  |                      |  |             |  |             |  |         |  |                     |  |      |  |
| GSMT3291019  | 0             | 0     | 0.008          | 0.03  | 0            | 0.105 | 0.015             | 0.016 | 0                          | 0     | 0.172                                | 0     | 0                         | 0.066 | 0.075                      | 0.156 | 0.004               | 0     | 0.04             | 0     | 0                  | 0     | 0.004     | 0.000 | 0.371          | 0.939 |                |  |                |  |                         |  |                           |  |                    |  |                      |  |             |  |             |  |         |  |                     |  |      |  |
| GSMT3291013  | 0             | 0.091 | 0.092          | 0.136 | 0            | 0.124 | 0.025             | 0     | 0                          | 0     | 0.082                                | 0     | 0                         | 0.122 | 0.064                      | 0.155 | 0                   | 0.044 | 0.052            | 0     | 0                  | 0     | 0.013     | 0.000 | 0.359          | 0.934 |                |  |                |  |                         |  |                           |  |                    |  |                      |  |             |  |             |  |         |  |                     |  |      |  |
| GSMT3291016  | 0.065         | 0     | 0.033          | 0.048 | 0            | 0.192 | 0.006             | 0     | 0                          | 0.028 | 0.013                                | 0     | 0.019                     | 0.13  | 0.062                      | 0.226 | 0                   | 0.061 | 0.107            | 0     | 0                  | 0     | 0.011     | 0.020 | 0.289          | 0.963 |                |  |                |  |                         |  |                           |  |                    |  |                      |  |             |  |             |  |         |  |                     |  |      |  |
| GSMT3291016  | 0.034         | 0     | 0.042          | 0.006 | 0            | 0.24  | 0                 | 0     | 0                          | 0.05  | 0.014                                | 0     | 0                         | 0.075 | 0.061                      | 0.204 | 0                   | 0.058 | 0.129            | 0     | 0                  | 0     | 0.087     | 0.020 | 0.242          | 0.982 |                |  |                |  |                         |  |                           |  |                    |  |                      |  |             |  |             |  |         |  |                     |  |      |  |
| GSMT3291017  | 0.009         | 0.004 | 0.021          | 0     | 0            | 0.12  | 0.004             | 0.002 | 0                          | 0     | 0.037                                | 0     | 0                         | 0.126 | 0.037                      | 0     | 0.138               | 0     | 0.225            | 0.148 | 0                  | 0     | 0         | 0.078 | 0.000          | 0.385 | 0.924          |  |                |  |                         |  |                           |  |                    |  |                      |  |             |  |             |  |         |  |                     |  |      |  |
| GSMT3291018  | 0             | 0.099 | 0.014          | 0.022 | 0            | 0.135 | 0.007             | 0.002 | 0                          | 0.054 | 0                                    | 0     | 0.003                     | 0.011 | 0.026                      | 0.224 | 0                   | 0.076 | 0.113            | 0     | 0.004              | 0     | 0         | 0     | 0.000          | 0.369 | 0.931          |  |                |  |                         |  |                           |  |                    |  |                      |  |             |  |             |  |         |  |                     |  |      |  |
| GSMT3291019  | 0             | 0.007 | 0.014          | 0.04  | 0            | 0.157 | 0                 | 0     | 0                          | 0.015 | 0.029                                | 0     | 0.028                     | 0.068 | 0.009                      | 0.266 | 0                   | 0.108 | 0.211            | 0     | 0                  | 0     | 0.048     | 0.020 | 0.254          | 0.980 |                |  |                |  |                         |  |                           |  |                    |  |                      |  |             |  |             |  |         |  |                     |  |      |  |
| GSMT3291016  | 0.011         | 0.001 | 0.028          | 0.057 | 0            | 0.29  | 0                 | 0     | 0                          | 0     | 0.021                                | 0     | 0.062                     | 0     | 0                          | 0.248 | 0                   | 0.038 | 0.179            | 0     | 0.004              | 0.058 | 0.020     | 0.277 | 0.968          |       |                |  |                |  |                         |  |                           |  |                    |  |                      |  |             |  |             |  |         |  |                     |  |      |  |
| GSMT3291017  | 0.039         | 0     | 0.024          | 0.085 | 0            | 0.257 | 0                 | 0     | 0                          | 0     | 0.011                                | 0     | 0.042                     | 0     | 0                          | 0.001 | 0.218               | 0     | 0.035            | 0.254 | 0                  | 0     | 0         | 0.033 | 0.020          | 0.247 | 0.982          |  |                |  |                         |  |                           |  |                    |  |                      |  |             |  |             |  |         |  |                     |  |      |  |
| GSMT3291018  | 0.029         | 0     | 0.02           | 0.031 | 0            | 0.31  | 0                 | 0     | 0                          | 0     | 0.013                                | 0.032 | 0.05                      | 0.004 | 0.065                      | 0.248 | 0                   | 0.028 | 0.119            | 0     | 0                  | 0     | 0.051     | 0.010 | 0.302          | 0.957 |                |  |                |  |                         |  |                           |  |                    |  |                      |  |             |  |             |  |         |  |                     |  |      |  |
| GSMT3291010  | 0.016         | 0.016 | 0.024          | 0.054 | 0            | 0.251 | 0                 | 0     | 0                          | 0     | 0                                    | 0     | 0.029                     | 0     | 0.03                       | 0.223 | 0.003               | 0.019 | 0.247            | 0     | 0                  | 0     | 0.008     | 0.000 | 0.337          | 0.944 |                |  |                |  |                         |  |                           |  |                    |  |                      |  |             |  |             |  |         |  |                     |  |      |  |
| GSMT3291013  | 0.02          | 0     | 0.017          | 0.024 | 0            | 0.151 | 0                 | 0     | 0                          | 0.012 | 0                                    | 0.013 | 0.127                     | 0.02  | 0.274                      | 0     | 0.151               | 0.098 | 0                | 0.008 | 0.046              | 0.010 | 0.292     | 0.968 |                |       |                |  |                |  |                         |  |                           |  |                    |  |                      |  |             |  |             |  |         |  |                     |  |      |  |
| GSMT3291015  | 0             | 0.005 | 0.01           | 0.013 | 0            | 0.14  | 0                 | 0     | 0                          | 0.006 | 0.037                                | 0     | 0.192                     | 0.111 | 0.012                      | 0.223 | 0                   | 0.081 | 0.078            | 0     | 0                  | 0     | 0.092     | 0.000 | 0.421          | 0.907 |                |  |                |  |                         |  |                           |  |                    |  |                      |  |             |  |             |  |         |  |                     |  |      |  |
| GSMT3291018  | 0.017         | 0.003 | 0.032          | 0.083 | 0            | 0.197 | 0                 | 0     | 0                          | 0.018 | 0                                    | 0     | 0.064                     | 0.113 | 0                          | 0.247 | 0                   | 0.049 | 0.148            | 0     | 0.006              | 0.024 | 0.020     | 0.288 | 0.964          |       |                |  |                |  |                         |  |                           |  |                    |  |                      |  |             |  |             |  |         |  |                     |  |      |  |
| GSMT32910083 | 0.007         | 0.04  | 0.005          | 0.01  | 0.008        | 0.158 | 0.041             | 0     | 0                          | 0.017 | 0.043                                | 0     | 0.248                     | 0.045 | 0.09                       | 0.165 | 0                   | 0.002 | 0.014            | 0     | 0                  | 0     | 0.106     | 0.000 | 0.396          | 0.919 |                |  |                |  |                         |  |                           |  |                    |  |                      |  |             |  |             |  |         |  |                     |  |      |  |
| GSMT32910085 | 0.015         | 0     | 0.025          | 0.064 | 0            | 0.317 | 0                 | 0     | 0                          | 0     | 0                                    | 0     | 0.156                     | 0     | 0                          | 0.235 | 0                   | 0.009 | 0.127            | 0     | 0                  | 0     | 0.058     | 0.000 | 0.353          | 0.937 |                |  |                |  |                         |  |                           |  |                    |  |                      |  |             |  |             |  |         |  |                     |  |      |  |
| GSMT32910086 | 0.062         | 0     | 0.028          | 0.031 | 0            | 0.159 | 0                 | 0     | 0                          | 0     | 0.064                                | 0     | 0.09                      | 0.097 | 0                          | 0.209 | 0                   | 0.082 | 0.029            | 0.021 | 0.015              | 0.115 | 0.020     | 0.253 | 0.980          |       |                |  |                |  |                         |  |                           |  |                    |  |                      |  |             |  |             |  |         |  |                     |  |      |  |
| GSMT32910088 | 0             | 0.012 | 0.011          | 0.05  | 0            | 0.079 | 0.011             | 0     | 0                          | 0     | 0.024                                | 0     | 0.03                      | 0.248 | 0                          | 0.267 | 0                   | 0.07  | 0.011            | 0.045 | 0.008              | 0.137 | 0.010     | 0.312 | 0.970          |       |                |  |                |  |                         |  |                           |  |                    |  |                      |  |             |  |             |  |         |  |                     |  |      |  |
| GSMT3290091  | 0.021         | 0     | 0.043          | 0.016 | 0            | 0.198 | 0                 | 0     | 0                          | 0     | 0.017                                | 0     | 0.027                     | 0.097 | 0                          | 0.223 | 0                   | 0.085 | 0.162            | 0     | 0                  | 0     | 0.112     | 0.000 | 0.336          | 0.944 |                |  |                |  |                         |  |                           |  |                    |  |                      |  |             |  |             |  |         |  |                     |  |      |  |
| GSMT3290092  | 0.019         | 0     | 0.026          | 0.02  | 0            | 0.147 | 0.011             | 0     | 0                          | 0.002 | 0.038                                | 0     | 0.112                     | 0.109 | 0.004                      | 0.275 | 0                   | 0.017 | 0.094            | 0     | 0                  | 0     | 0.079     | 0.000 | 0.422          | 0.906 |                |  |                |  |                         |  |                           |  |                    |  |                      |  |             |  |             |  |         |  |                     |  |      |  |
| GSMT3290093  | 0.017         | 0     | 0.035          | 0.013 | 0            | 0.161 | 0                 | 0     | 0                          | 0     | 0.029                                | 0     | 0.131                     | 0.076 | 0.001                      | 0.215 | 0                   | 0.019 | 0.133            | 0     | 0                  | 0     | 0.073     | 0.000 | 0.337          | 0.945 |                |  |                |  |                         |  |                           |  |                    |  |                      |  |             |  |             |  |         |  |                     |  |      |  |
| GSMT3290094  | 0.001         | 0.008 | 0.025          | 0.017 | 0            | 0.169 | 0                 | 0     | 0                          | 0     | 0                                    | 0.019 | 0                         | 0.117 | 0                          | 0.254 | 0                   | 0.096 | 0.154            | 0     | 0                  | 0     | 0.139     | 0.000 | 0.349          | 0.940 |                |  |                |  |                         |  |                           |  |                    |  |                      |  |             |  |             |  |         |  |                     |  |      |  |
| GSMT3290097  | 0             | 0.002 | 0.053          | 0.012 | 0            | 0.217 | 0                 | 0     | 0                          | 0     | 0.032                                | 0.006 | 0.052                     | 0.069 | 0                          | 0.123 | 0                   | 0.172 | 0.13             | 0     | 0.023              | 0.108 | 0.000     | 0.317 | 0.951          |       |                |  |                |  |                         |  |                           |  |                    |  |                      |  |             |  |             |  |         |  |                     |  |      |  |
| GSMT3290098  | 0.032         | 0     | 0.015          | 0.024 | 0.001        | 0.118 | 0                 | 0     | 0                          | 0     | 0.016                                | 0.007 | 0.099                     | 0.178 | 0                          | 0.082 | 0                   | 0.217 | 0.038            | 0     | 0.01               | 0.163 | 0.000     | 0.424 | 0.907          |       |                |  |                |  |                         |  |                           |  |                    |  |                      |  |             |  |             |  |         |  |                     |  |      |  |
| GSMT3291010  | 0.02          | 0     | 0.016          | 0.029 | 0.062        | 0.152 | 0.019             | 0     | 0                          | 0     | 0.028                                | 0     | 0.109                     | 0.063 | 0                          | 0.235 | 0                   | 0.017 | 0.096            | 0     | 0                  | 0     | 0.152     | 0.000 | 0.402          | 0.915 |                |  |                |  |                         |  |                           |  |                    |  |                      |  |             |  |             |  |         |  |                     |  |      |  |
| GSMT3291011  | 0.008         | 0     | 0.021          | 0.018 | 0            | 0.195 | 0                 | 0     | 0                          | 0     | 0                                    | 0.015 | 0.137                     | 0.073 | 0                          | 0.209 | 0                   | 0.077 | 0.155            | 0     | 0                  | 0     | 0.092     | 0.000 | 0.399          | 0.916 |                |  |                |  |                         |  |                           |  |                    |  |                      |  |             |  |             |  |         |  |                     |  |      |  |
|              |               |       |                |       |              |       |                   |       |                            |       |                                      |       |                           |       |                            |       |                     |       |                  |       |                    |       |           |       |                |       |                |  |                |  |                         |  |                           |  |                    |  |                      |  |             |  |             |  |         |  |                     |  |      |  |
