# Supplementary material for: Identification of Potential Risk Genes and the Immune Landscape of Idiopathic Pulmonary Arterial Hypertension via Microarray Gene Expression Dataset Reanalysis
Source: MDPI journal article supplement (doi:10.3390/genes12010125), 2021-01-19

KEGG\_ALLOGRAFT\_REJECTION

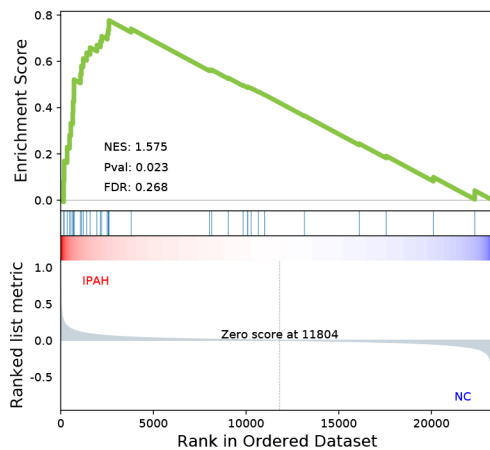

KEGG\_VIRAL\_MYOCARDITIS

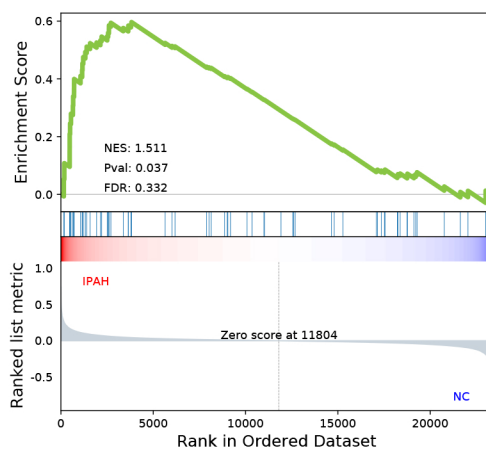

KEGG\_MELANOGENESIS

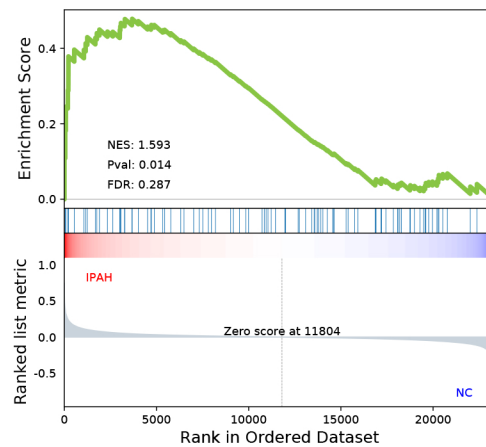

KEGG\_LONG\_TERM\_POTENTIATION

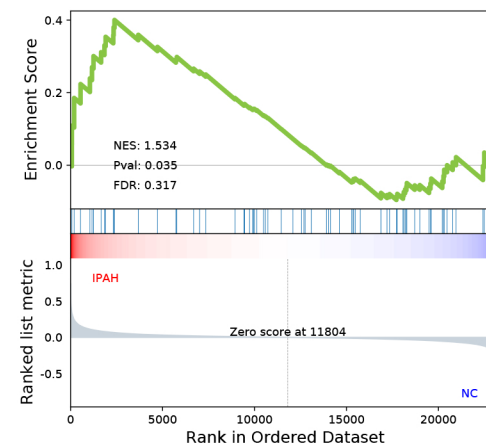

KEGG\_HEDGEHOG\_SIGNALING\_PATHWAY

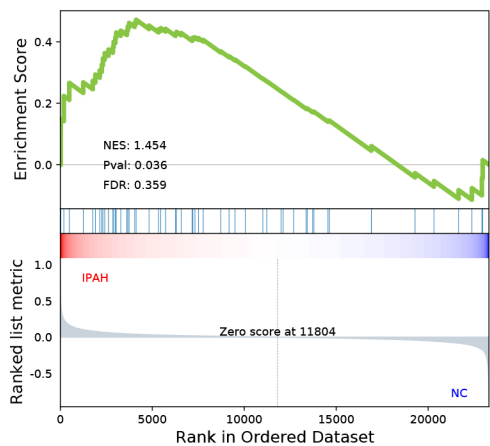

KEGG\_DILATED\_CARDIOMYOPATHY

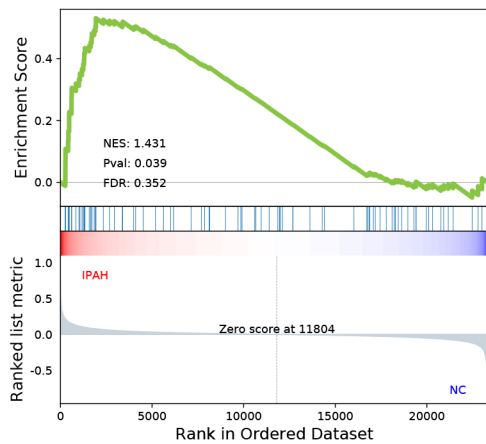

KEGG\_AUTOIMMUNE\_THYROID\_DISEASE

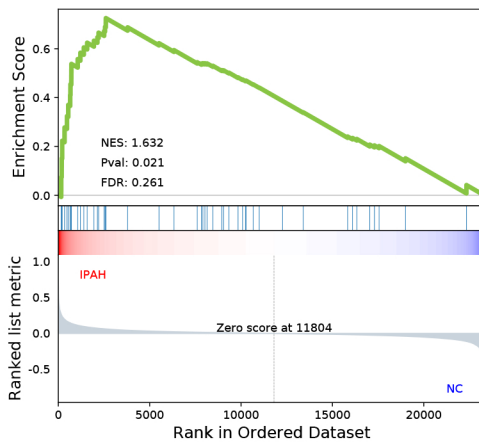

KEGG\_ARRHYTHMOGENIC\_RIGHT\_VENTRICULAR\_CARDIOMYOPATHY\_ARVC

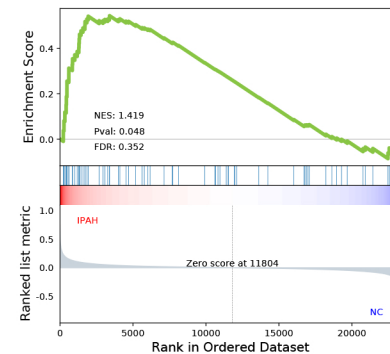

Supplement: s1 [file s1]
