# Supplementary material for: Identification of Potential Risk Genes and the Immune Landscape of Idiopathic Pulmonary Arterial Hypertension via Microarray Gene Expression Dataset Reanalysis
Source: MDPI journal article supplement (doi:10.3390/genes12010125), 2021-01-19

KEGG\_PANTOTHENATE\_AND\_COA\_BIOSYNTHESIS

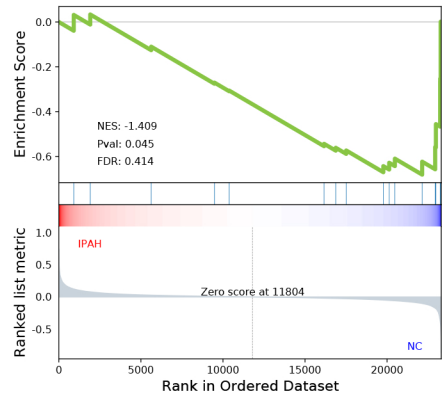

KEGG\_PYRUVATE\_METABOLISM

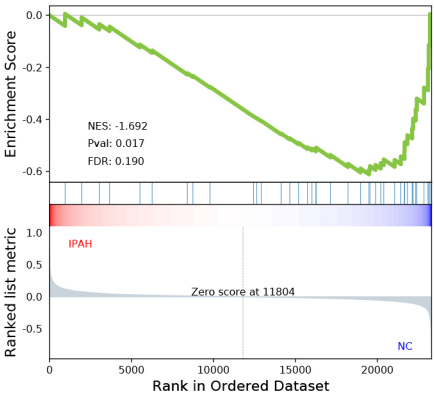

KEGG\_TERPENOID\_BACKBONE\_BIOSYNTHESIS

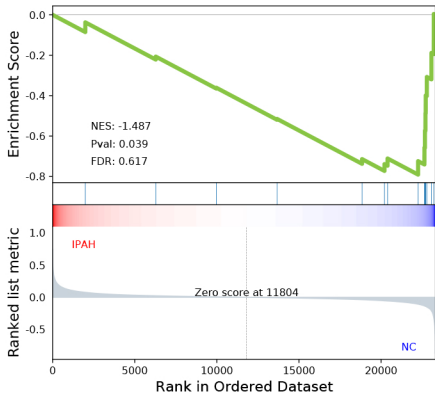

KEGG\_AMINO\_SUGAR\_AND\_NUCLEOTIDE\_SUGAR\_METABOLISM

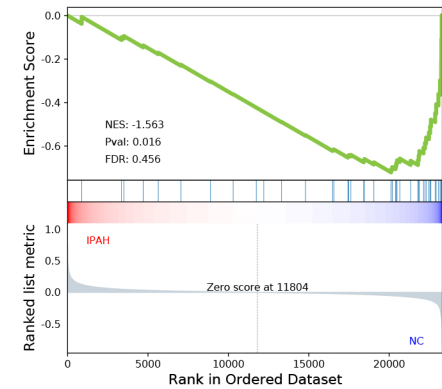

KEGG\_BUTANOATE\_METABOLISM

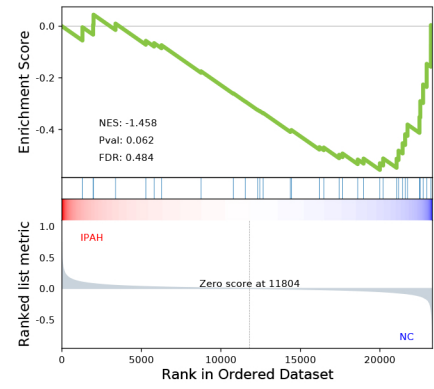

KEGG\_PENTOSE\_PHOSPHATE\_PATHWAY

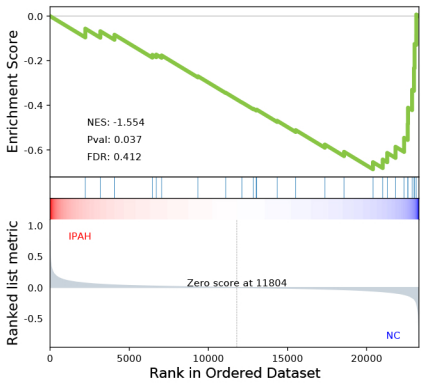

KEGG\_STEROID\_BIOSYNTHESIS

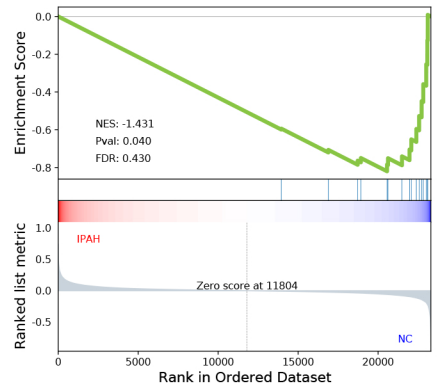

KEGG\_GLUTATHIONE\_METABOLISM

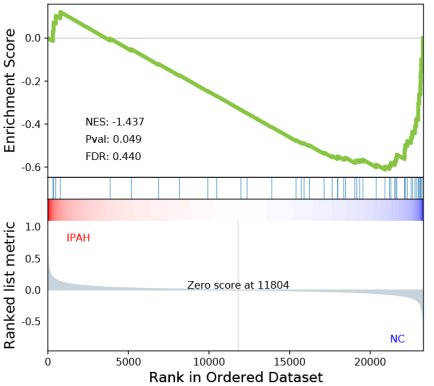

KEGG\_GLYCOSYLPHOSPHATIDYLINOSITOL\_GPI\_ANCHOR\_BIOSYNTHESIS

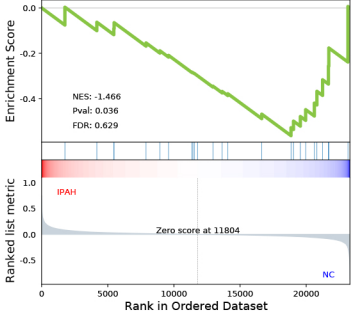

Supplement: s1 [file s1]
